# Supplementary material for: The Ethicality of Mandatory COVID-19 Vaccinations in Uganda: A Qualitative Study
Source: Research Square preprint supplement (doi:10.21203/rs.3.rs-8404180/v1), 2026-01-20

# Interview Guide for Healthcare Workers

## Appendix 1: Interview guide for Doctors at Mulago National Referral Hospital

**Study title:** The Ethicality of mandatory COVID-19 vaccinations in Uganda: A Qualitative Study

### Socio-demographics

Age: .....  
Gender: .....  
Level of education: .....  
Medical specialty: .....  
Years of work experience: .....

### Questions

1. Please tell me a little about yourself and your role at the hospital.
2. When the government brought COVID-19 vaccines into the country, what came to your mind? How do you feel about the COVID-19 vaccines?
3. How at risk did you think you were of contracting COVID-19? Considering your risk, did you think it was desirable for you to get vaccinated for COVID-19?
4. What concerns did you have about getting the COVID-19 vaccine? (Concerns about the effectiveness and safety of vaccines, risks/side effects).
5. What other factors influenced your intention to be vaccinated or not to be vaccinated?
6. What did your family/friends/work colleagues think about this vaccination?
7. Did you feel you had adequate information to decide whether to have the COVID-19 vaccine? If not, what sort of information did you lack? Please elaborate.
8. How did your decision to get vaccinated or not to get vaccinated affect your work or affect you at your workplace?
9. What is your view on compulsory COVID-19 vaccinations? In your view was right to mandate COVID-19 vaccinations? Please explain your answer.
10. How did the requirement for mandatory vaccination affect you?
11. How did it affect the uptake of vaccines among health workers generally?

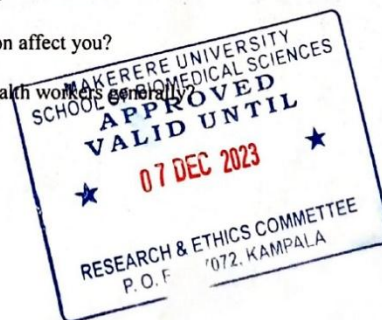

12. What could have been the alternatives to mandatory vaccination? What would you suggest as an appropriate way to encourage people to get vaccinated?

13. What are your suggestions for promoting the uptake of vaccines in Uganda?

14. Is there anything you would like to add to what we have discussed?

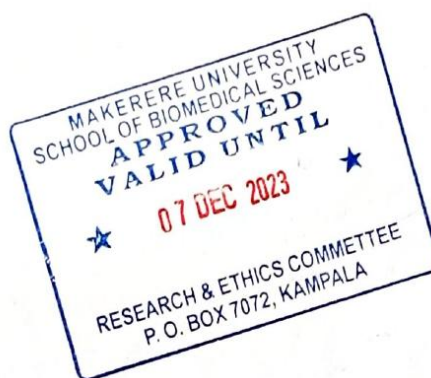

# Interview Guide for Bioethicists

## Appendix 1: Interview guide for Bioethicists at Makerere University Kampala

**Study title:** The Ethicality of mandatory COVID-19 vaccinations in Uganda: A Qualitative Study

### Socio-demographics

Age: .....

Sex: .....

Level of education: .....

Field of specialization: .....

### Questions

1. Please me about the kind of work you do as a Bioethicist?
2. The government introduced vaccines in Uganda, as a way of controlling the spread of COVID-19. What are your experiences of the public's perception of vaccines?
3. What were the main concerns among the public regarding COVID-19 vaccines? (Concerns regarding the efficacy of the vaccines, side effects).
4. As a Bioethicist what ethical issues came to your attention during the covid-19 vaccinations in Uganda?
5. As a Bioethicist, what were your expectations regarding the COVID-19 vaccination campaign?
6. Where else did the government go wrong in handling the issue of COVID-19 vaccination in Uganda?
7. Were these concerns adequately addressed by the government or health workers? (How could the government have addressed them)
8. What were the other barriers to the uptake of vaccines among the public?

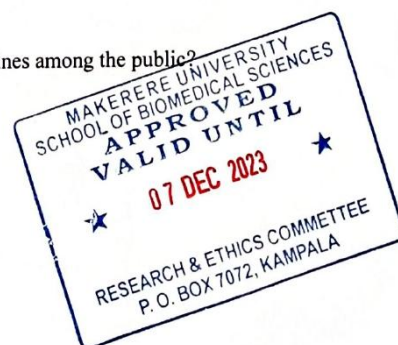

9. How was communication and public engagement handled during the COVID-19 vaccination (what were some of the gaps?)
10. In your view was the public given adequate information? What was not communicated to the public about the vaccines?
11. What was your take on the government making COVID-19 vaccinations mandatory?
12. In your view was it the right approach to take? What else could have been done?
13. How did making vaccination mandatory affect COVID-19 vaccine uptake by the public? (How did it affect public trust?)
14. What were the other consequences of making the COVID-19 vaccine mandatory? (How were individual rights affected?)
15. What can be done to improve the uptake of vaccines in Uganda and improve trust?
16. Is there anything you would like to add to what we have discussed?

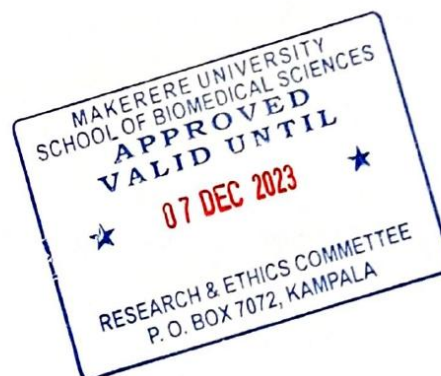

## Focus Group Discussion Guide for General Public

### Appendix 1: Focus Group Discussion guide for the general public in Wandegaya and Mulago

**Study title:** The Ethicality of mandatory COVID-19 vaccinations in Uganda: A Qualitative Study

#### Socio-demographics

Age: .....

Sex: .....

Level of education: .....

Field of specialization: .....

Religious denomination: .....

#### Questions

1. What do you know/ what did you hear about COVID-19?
2. How would you describe the COVID-19 Pandemic experience?
3. What have you heard about the COVID-19 vaccines?
4. When the government introduced COVID-19 vaccines? How did you feel about them?
5. Did you take the vaccine? Did you try to take the vaccine? Would you take COVID-19 vaccination? Explain why?
6. What factors influenced your intention to be vaccinated or not?
7. What are your concerns regarding COVID-19 vaccine?
8. What is your view on compulsory COVID-19 vaccinations?
9. Do you think it was right to mandate COVID-19 vaccinations? If not why?
10. What are the benefits and challenges in mandatory COVID-19 vaccinations?
11. Did you experience any challenge after COVID-19 vaccination?
12. What would you suggest as appropriate criteria for mandating vaccinations?
13. Is there anything you would like to add on what we have discussed?

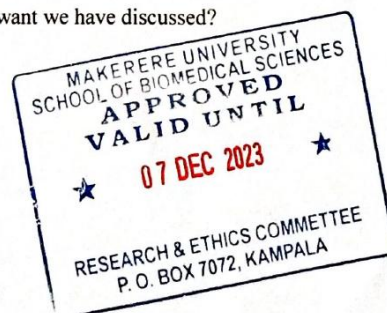

Supplement: Supplementary file 1 [file 97a372d2642713efa090125f.pdf]
